# Supplementary material for: A Network Pharmacology and Multi-Omics Combination Approach to Reveal the Effect of Strontium on Ca2+ Metabolism in Bovine Rumen Epithelial Cells
Source: MDPI journal article supplement (doi:10.3390/ijms24119383), 2023-05-27
Supplement: s1 [file s1]

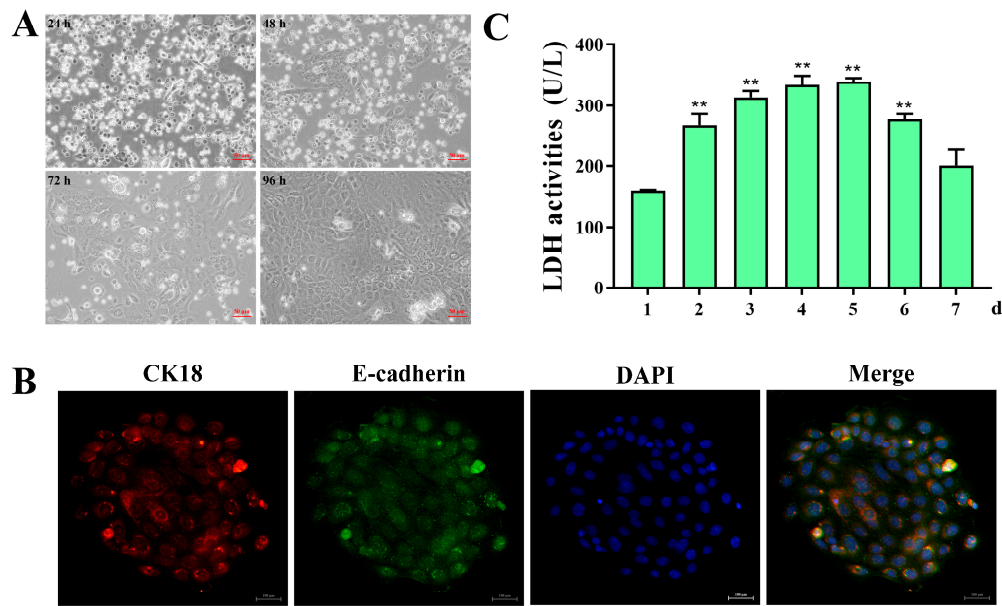

Figure S1 Culture and identification of rumen epithelial cells. (A) Cultured rumen epithelial cells. (B) Identification rumen epithelial cells by CK18 and E-cadherin positive expression. (C) LDH activity assays, the LDH activity significantly increased from day 2 to day 6.

Table S1 The results of Shapiro-Wilk test

| Groups<br>Genes | Shapiro-Wilk test             |                               |                               |                               |
|-----------------|-------------------------------|-------------------------------|-------------------------------|-------------------------------|
|                 | 0 mmol/L                      | 1 mmol/L                      | 10 mmol/L                     | 20 mmol/L                     |
| CYP11A1         | 0.9614<br>( <i>P</i> =0.7877) | 0.9525<br>( <i>P</i> =0.7316) | 0.9174<br>( <i>P</i> =0.5225) | 0.9412<br>( <i>P</i> =0.6618) |
| AHCYL2          | 0.8227<br>( <i>P</i> =0.1495) | 0.8442<br>( <i>P</i> =0.2078) | 0.9316<br>( <i>P</i> =0.6038) | 0.9127<br>( <i>P</i> =0.4968) |
| UPK1B           | 0.9950<br>( <i>P</i> =0.9813) | 0.9353<br>( <i>P</i> =0.6262) | 0.8651<br>( <i>P</i> =0.2791) | 0.8986<br>( <i>P</i> =0.4239) |
| WWC2            | 0.8753<br>( <i>P</i> =0.3189) | 0.9270<br>( <i>P</i> =0.5771) | 0.9864<br>( <i>P</i> =0.9384) | 0.9021<br>( <i>P</i> =0.4415) |
| TGF- $\beta$ 2  | 0.8553<br>( <i>P</i> =0.2437) | 0.8266<br>( <i>P</i> =0.1592) | 0.9327<br>( <i>P</i> =0.6102) | 0.8619<br>( <i>P</i> =0.2670) |
| SEMA3A          | 0.8186<br>( <i>P</i> =0.1400) | 0.8613<br>( <i>P</i> =0.2647) | 0.8748<br>( <i>P</i> =0.3169) | 0.9290<br>( <i>P</i> =0.5887) |
| PTHLH           | 0.8756<br>( <i>P</i> =0.3202) | 0.8567<br>( <i>P</i> =0.2484) | 0.8685<br>( <i>P</i> =0.2918) | 0.9038<br>( <i>P</i> =0.4502) |
| CA2             | 0.9366<br>( <i>P</i> =0.6338) | 0.9199<br>( <i>P</i> =0.5364) | 0.8892<br>( <i>P</i> =0.3793) | 0.8638<br>( <i>P</i> =0.2740) |
| TGFBI           | 0.9004<br>( <i>P</i> =0.4330) | 0.9760<br>( <i>P</i> =0.8780) | 0.8054<br>( <i>P</i> =0.1123) | 0.9344<br>( <i>P</i> =0.6207) |
